# Supplementary material for: Psychological Distress, Dental Health, and Dental Fear among Finnish University Students: A National Survey
Source: MDPI journal article supplement (doi:10.3390/ijerph181910245), 2021-09-29
Supplement: s1 [file s1]

**Table S1. Variables Used in the Study with the Question(s), Answer Options and Dicotomization.**

| Variable                                             | Question(s)                                                                | Answer options                                                                                                                                | Dicotomization                                                                                                                        |
|------------------------------------------------------|----------------------------------------------------------------------------|-----------------------------------------------------------------------------------------------------------------------------------------------|---------------------------------------------------------------------------------------------------------------------------------------|
| Dental fear                                          | "Do you feel scared about receiving dental care?"                          | 1= "Not at all"<br>2= "Somewhat"<br>3= "Very"                                                                                                 | 0= Not at all or somewhat<br>1= Very                                                                                                  |
| Clinical Outcomes in Routine Evaluation 10 (CORE-10) | (1) "I have felt tense, anxious or nervous"                                |                                                                                                                                               |                                                                                                                                       |
|                                                      | (2) "I have felt I have someone to turn to for support when needed"        |                                                                                                                                               |                                                                                                                                       |
|                                                      | (3) "I have felt able to cope when things go wrong"                        | 5-point scale                                                                                                                                 |                                                                                                                                       |
|                                                      | (4) "Talking to people has felt too much for me"                           | 0= "Not at all"<br>1= "Only occasionally"                                                                                                     | 0= Scores $\leq 10$ representing a lower or negative CORE-10 score and scores                                                         |
|                                                      | (5) "I have felt panic or terror"                                          | 2= "Sometimes"<br>3= "Often"                                                                                                                  | 1= Scores $\geq 11$ representing higher or positive CORE-10 score                                                                     |
|                                                      | (6) "I made plans to end my life"                                          | 4= "Most or all the time"                                                                                                                     |                                                                                                                                       |
|                                                      | (7) "I have difficulty getting to sleep or staying asleep"                 |                                                                                                                                               |                                                                                                                                       |
|                                                      | (8) "I have felt despairing or hopeless"                                   |                                                                                                                                               |                                                                                                                                       |
|                                                      | (9) "I have felt unhappy"                                                  |                                                                                                                                               |                                                                                                                                       |
|                                                      | (10) "Unwanted images or memories have been distressing me".               |                                                                                                                                               |                                                                                                                                       |
| General Health Questionnaire 12 (GHQ-12)             |                                                                            | Four-point scale with bi-modal (0-0-1-1)<br>0= "Better than usual"<br>0= "Same as usual"<br>1= "Less than usual"<br>1= "Much less than usual" | 0= Scores $\leq 3$ representing a lower or negative GHQ-12 score<br>1= Scores $\geq 4$ representing a higher or positive GHQ-12 score |
|                                                      | (1) "Have you recently been able to concentrate on your tasks?"            | 0= "Not at all"<br>0= "No more than usual"<br>1= "Rather more than usual"<br>1= "Much more than usual"                                        |                                                                                                                                       |
|                                                      | (2) "Have you recently lost much sleep because you've been worried?"       | 0= "More than usual"                                                                                                                          |                                                                                                                                       |
|                                                      | (3) "Have you recently felt that you are playing a useful part in things?" | 0= "Same as usual"<br>1= "Less useful than usual"<br>1= "Much less than usual"                                                                |                                                                                                                                       |
|                                                      | (4) "Have you recently felt capable of making decisions"                   | 0= "Better than usual"<br>0= "Same as usual"<br>1= "Less than usual"                                                                          |                                                                                                                                       |

|      |                                                                           |                             |
|------|---------------------------------------------------------------------------|-----------------------------|
|      |                                                                           | 1= "Much less than usual")  |
|      |                                                                           | 0= "Not at all"             |
|      |                                                                           | 0= "No more than usual"     |
| (5)  | "Have you recently felt constantly under strain?"                         | 1= "Rather more than usual" |
|      |                                                                           | 1= "Much more than usual"   |
|      |                                                                           | 0= "Not at all"             |
|      |                                                                           | 0= "No more than usual"     |
| (6)  | "Have you recently felt that you could not overcome your difficulties?"   | 1= "Rather more than usual" |
|      |                                                                           | 1= "Much more than usual"   |
|      |                                                                           | 0= "More than usual"        |
|      |                                                                           | 0= "Same as usual"          |
| (7)  | "Have you recently been able to enjoy your day-to-day activities?"        | 1= "Less than usual"        |
|      |                                                                           | 1= "Much less than usual"   |
|      |                                                                           | 0= "Better than usual"      |
| (8)  | "Have you recently been able to face up to your problems?"                | 0= "Same as usual"          |
|      |                                                                           | 1= "Less than usual"        |
|      |                                                                           | 1= "Much less than usual"   |
|      |                                                                           | 0= "Not at all"             |
|      |                                                                           | 0= "No more than usual"     |
| (9)  | "Have you recently been feeling unhappy and depressed?"                   | 1= "Rather more than usual" |
|      |                                                                           | 1= "Much more than usual"   |
|      |                                                                           | 0= "Not at all"             |
|      |                                                                           | 0= "No more than usual"     |
| (10) | "Have you recently been losing confidence in yourself?"                   | 1= "Rather more than usual" |
|      |                                                                           | 1= "Much more than usual"   |
|      |                                                                           | 0= "Not at all"             |
|      |                                                                           | 0= "No more than usual"     |
| (11) | "Have you recently been thinking of yourself as a worthless person?"      | 1= "Rather more than usual" |
|      |                                                                           | 1= "Much more than usual"   |
|      |                                                                           | 0= "More so than usual"     |
| (12) | "Have you recently been feeling reasonably happy, all things considered?" | 0= "Same as usual"          |

---

|                        |                                                                                            |                                                                                                                                                                             |                                                        |
|------------------------|--------------------------------------------------------------------------------------------|-----------------------------------------------------------------------------------------------------------------------------------------------------------------------------|--------------------------------------------------------|
|                        |                                                                                            | 1= "Less so than usual"                                                                                                                                                     |                                                        |
|                        |                                                                                            | 1= "Much less than usual"                                                                                                                                                   |                                                        |
| Teeth-related symptoms | "Have you had tooth problems (shooting pain, toothache) over the past month (30 days)?"    | 1= "Not at all"<br>2= "Every now and then"<br>3= "Weekly"<br>4 = "Daily or almost daily"                                                                                    | 0= Not at all<br>1= Sometimes, weekly or daily         |
| Tobacco use            | "Do you smoke?"<br>"Do you use snuff?"                                                     | 1= "Not at all"<br>2= "Yes previously but I have quit"<br>3= "Less than once a week"<br>4= "Weekly but not daily"<br>5= "Daily"                                             | 0= Not at all or having quit<br>1= Yes                 |
| Educational sectors    | In which university do you study?<br>In which university of applied sciences do you study? | 1= "Universities"<br>2= "Universities of applied sciences"                                                                                                                  | 0= Universities<br>1= Universities of applied sciences |
| Age                    | Age in years?                                                                              | In six groups<br>1= 19-22 years<br>2= 23-24 years<br>3= 25-27 years<br>4= 28-30 years<br>5= 31-33 years<br>6= 34 -35<br>In three group<br>1= 19-24<br>2= 25- 30<br>3= 31-35 | 0= 19-21<br>1= 22 years or older                       |
| Gender                 | Gender<br>1= Male<br>2= Female<br>3= Other                                                 | 1= Men<br>2= Women                                                                                                                                                          | 0= Men<br>1= Women                                     |
